# Supplementary material
Source: PubMed Central journal article supplement (PMC7541720)

**Supplementary Figure 3:** Top panel: forest plots for study-specific hazard ratios (HR) and 95% confidence intervals (CI) for A) 1p22.3- rs2911600 B) 8q23.3 - rs7822185 C) 9q31.3 - rs4978466 D) 10p14 - rs17143938 E) 4p14 - rs17603438 F) 5q11.2 - rs10041935 G) 7p21.3 - rs10247578 H) 10p15.3 - rs17158233 and I) 11q14.1 - rs17148028. Bottom panel: regional plots of association results and recombination rates. For each SNP, association results in the combined GWAS lung cancer cases,  $-\log_{10}P$  values (y-axis), are shown according to their corresponding chromosomal positions (x-axis) and genetic recombination rates from 1000 Genomes CEU samples. The most significant SNP genotyped labeled by its rsID is denoted by a purple circle. Center panel: Kaplan-Meier plot by genotype of the sentinel variant over 5-year time period.

**Supplementary Figure 3A:** Forest plot for study specific hazard ratio and regional plot (1p22.3-rs2911600)

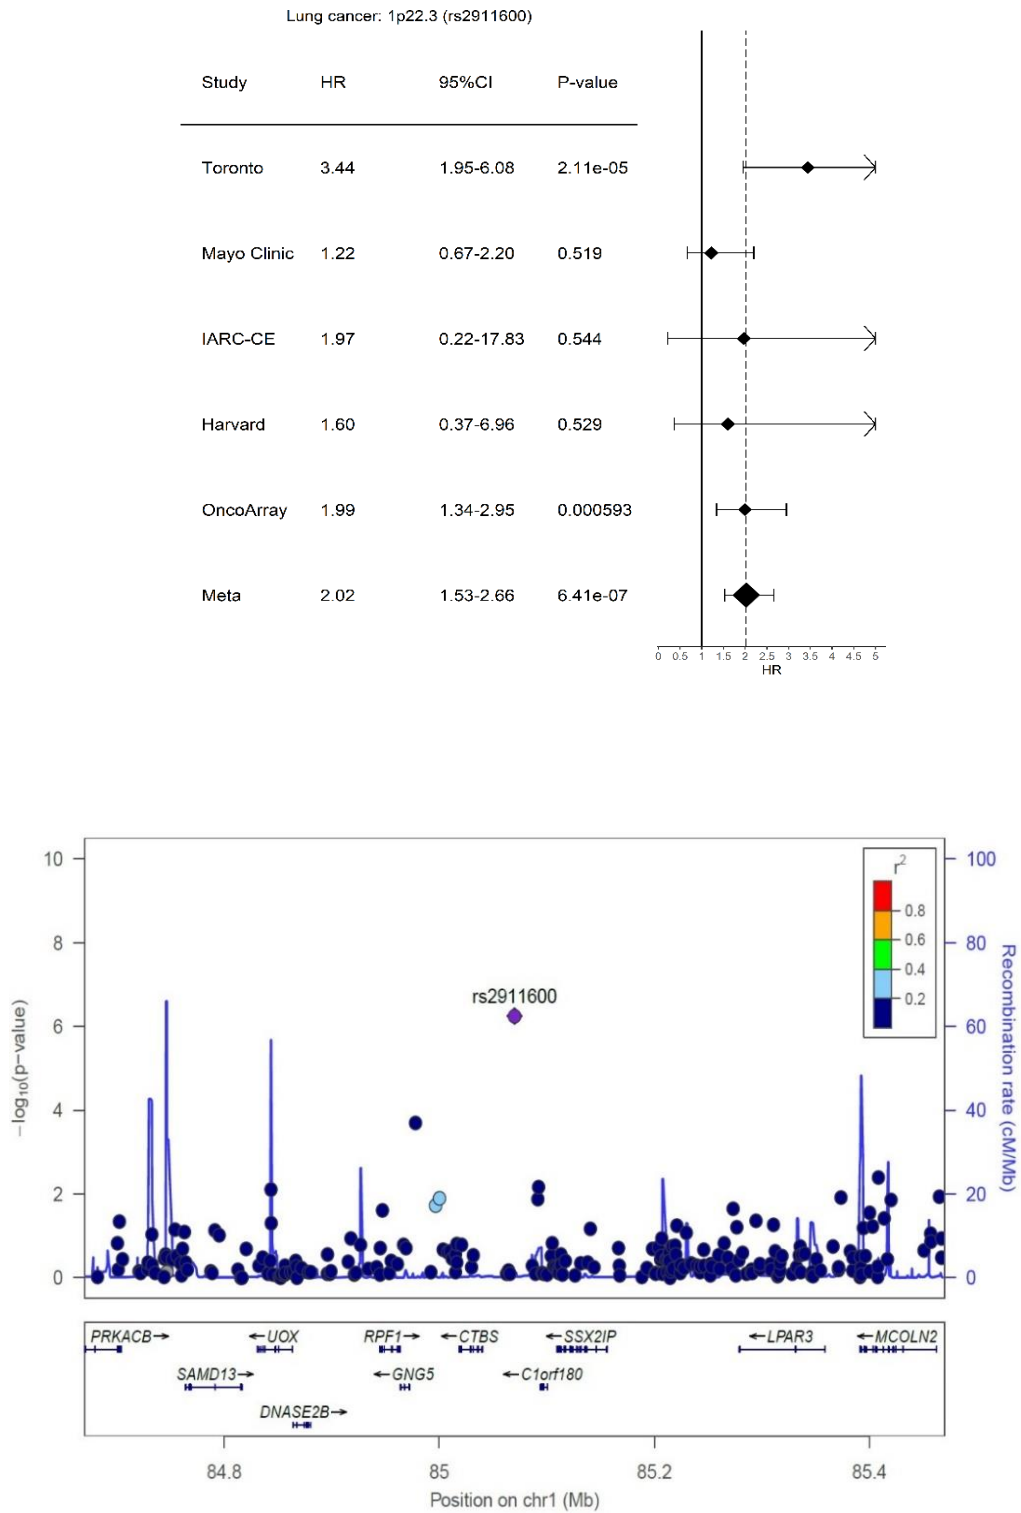

**Supplementary Figure 3B:** Forest plot for study specific hazard ratio and regional plot (8q23.3 - rs7822185)

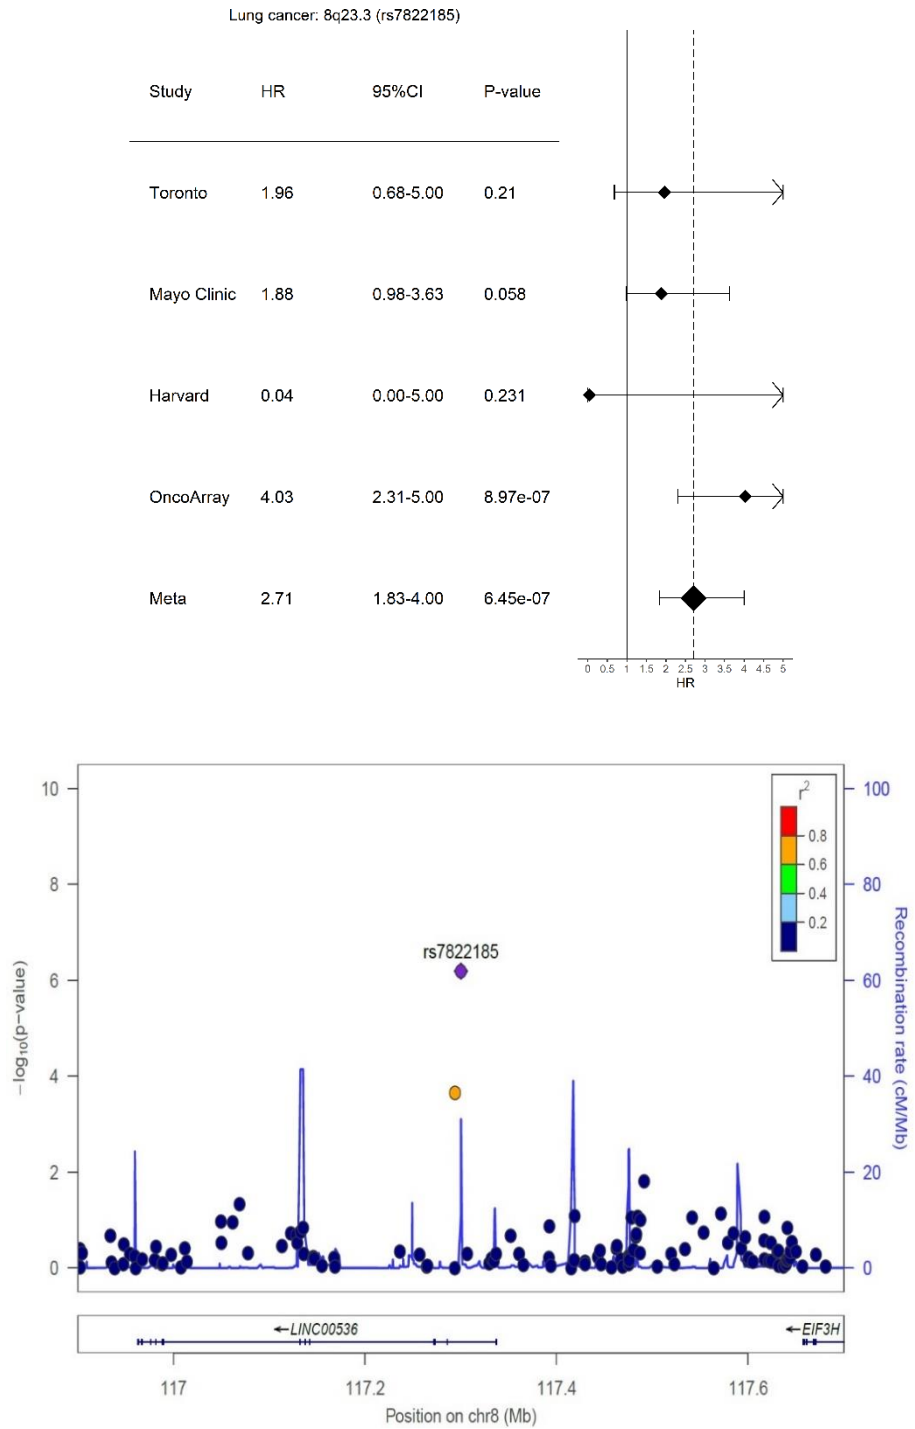

**Supplementary Figure 3C: Forest plot for study specific hazard ratio and regional plot (9q31.3 - rs4978466)**

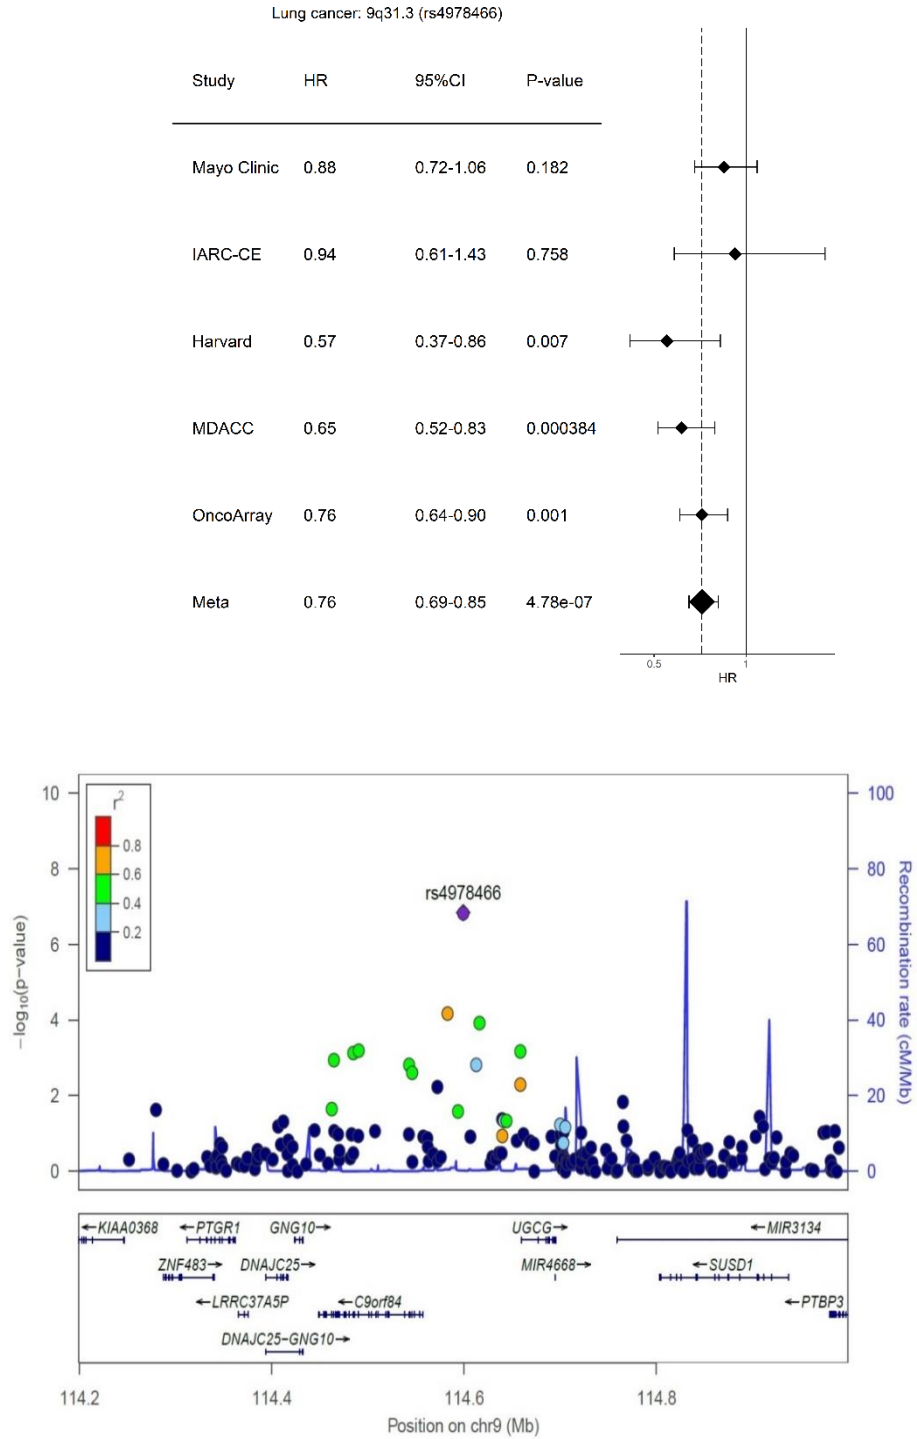

**Supplementary Figure 3D: Forest plot for study specific hazard ratio and regional plot (10p14 - rs17143938)**

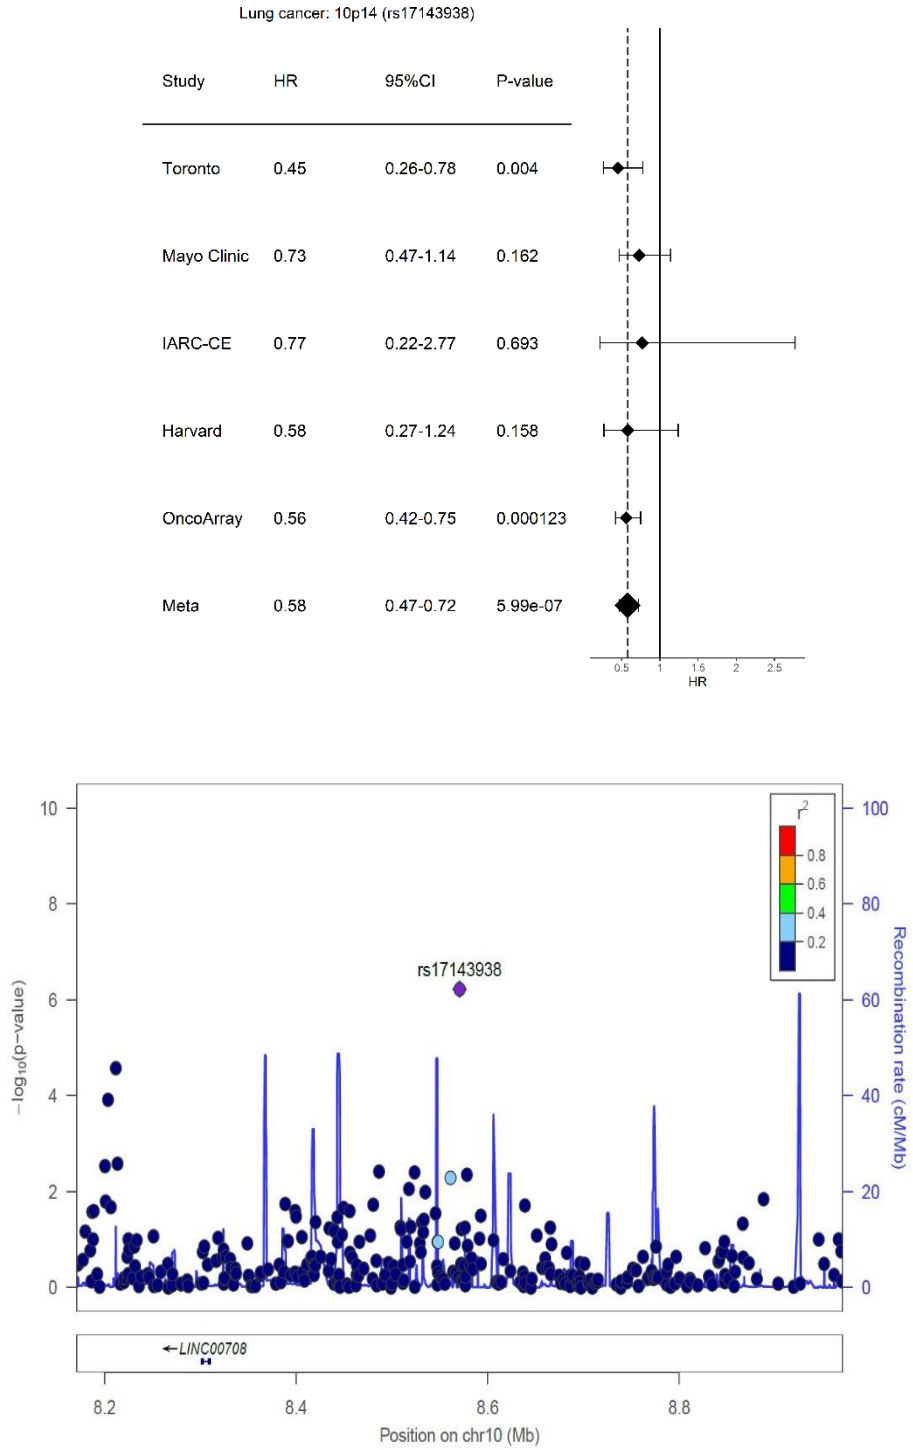

**Supplementary Figure 3E: Forest plot for study specific hazard ratio and regional plot (4p14 - rs17603438)**

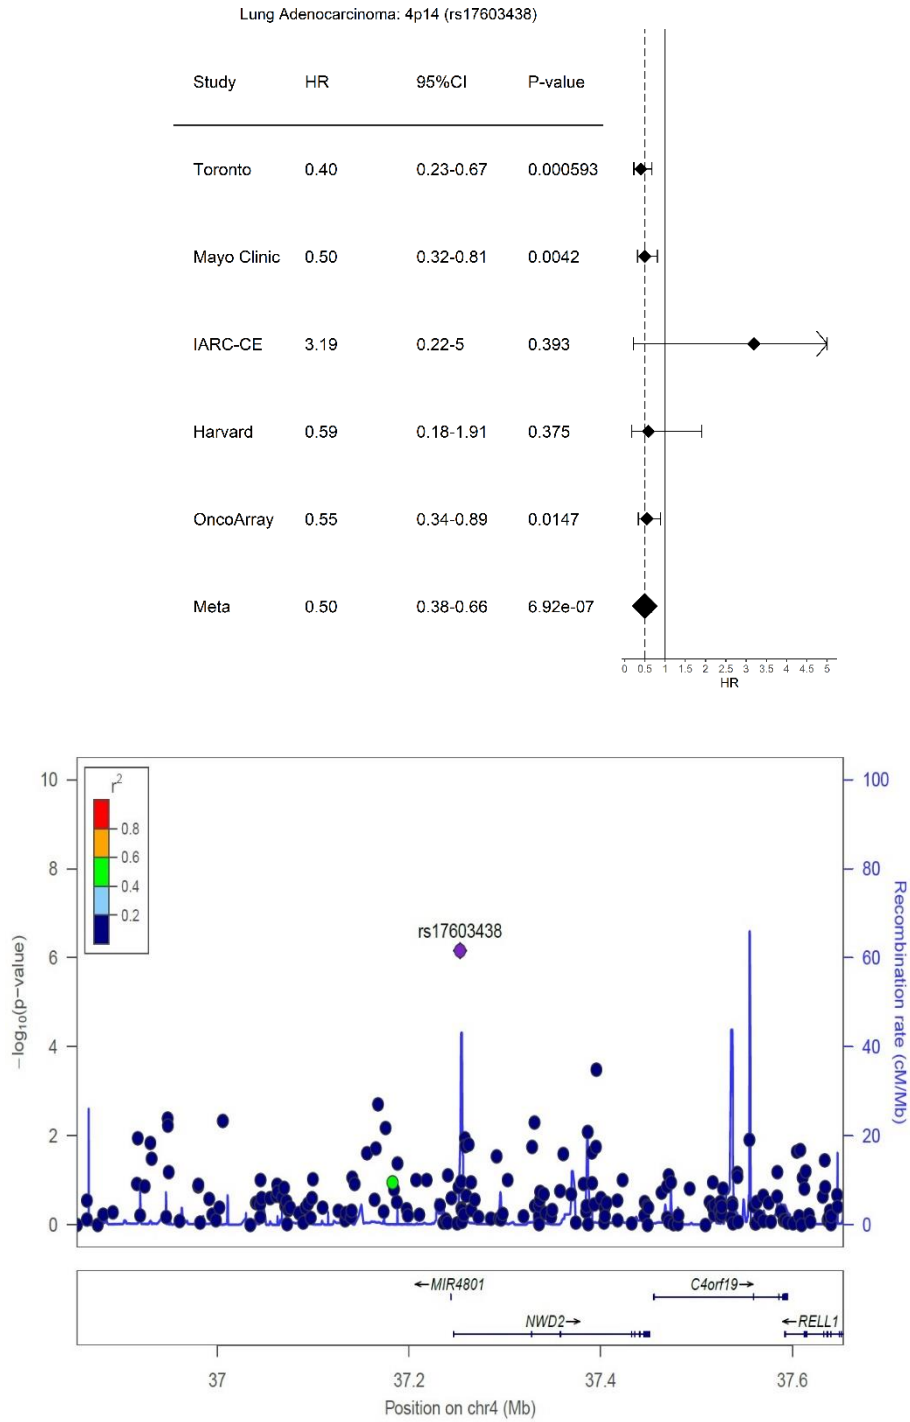

**Supplementary Figure 3F:** Forest plot for study specific hazard ratio and regional plot (5q11.2 - rs10041935)

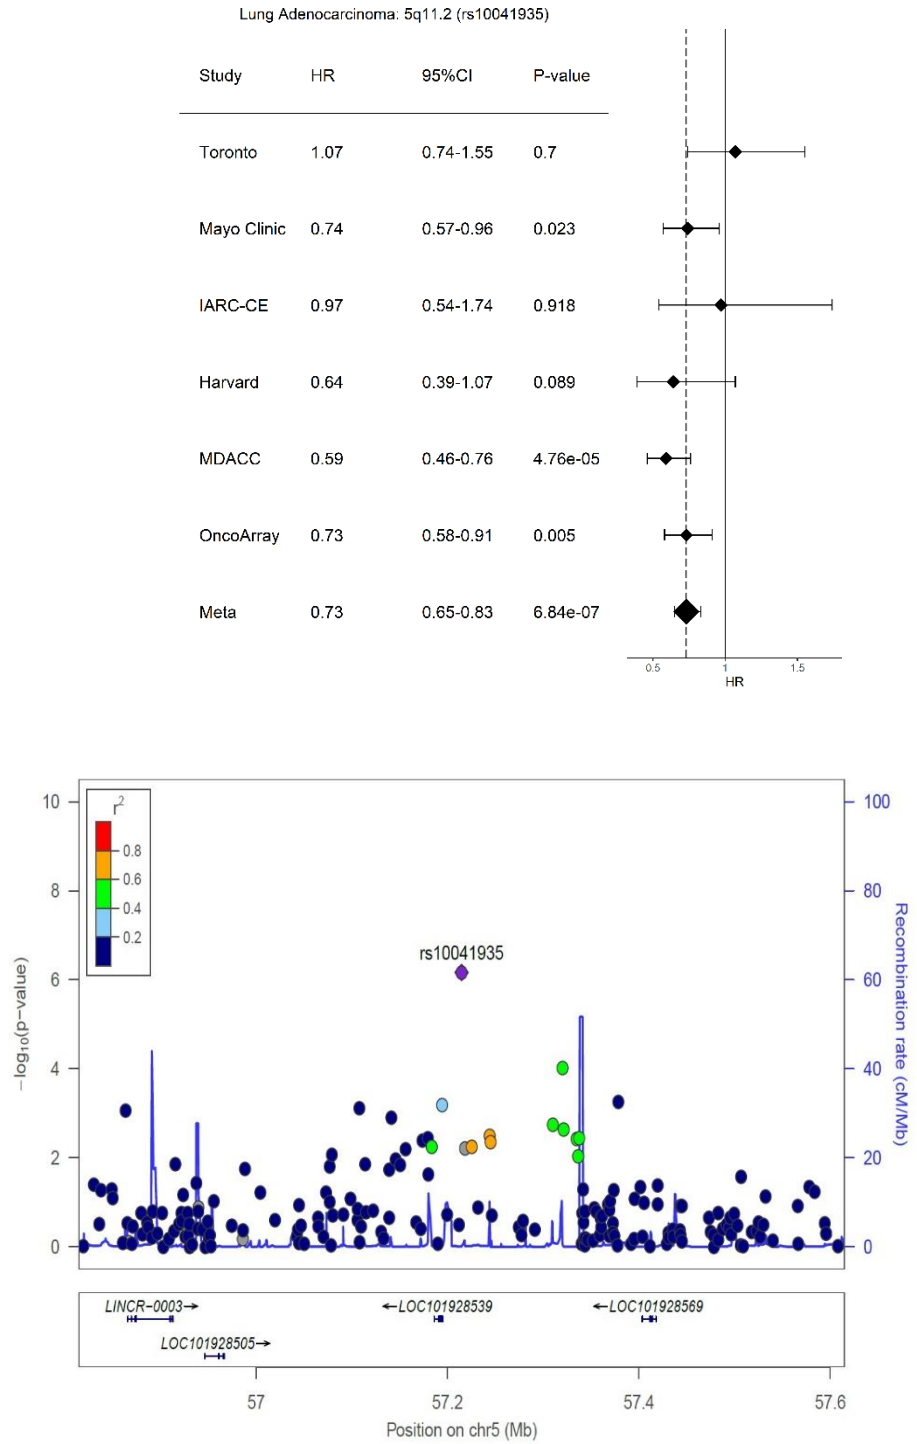

**Supplementary Figure 3G:** Forest plot for study specific hazard ratio and regional plot (7p21.3 - rs10247578)

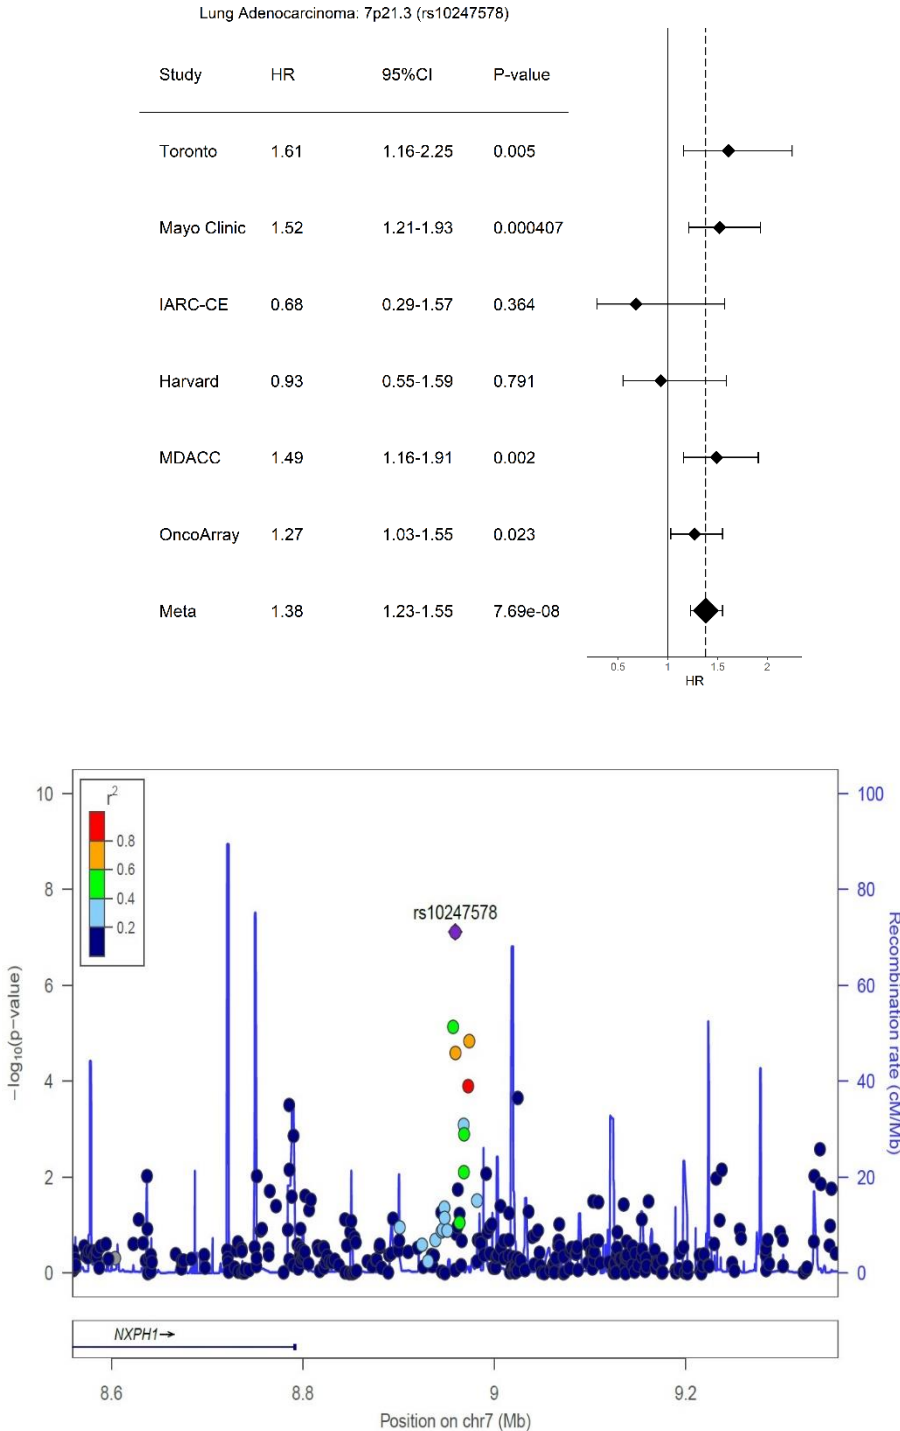



**Supplementary Figure 3H: Forest plot for study specific hazard ratio and regional plot (10p15.3 - rs17158233)**

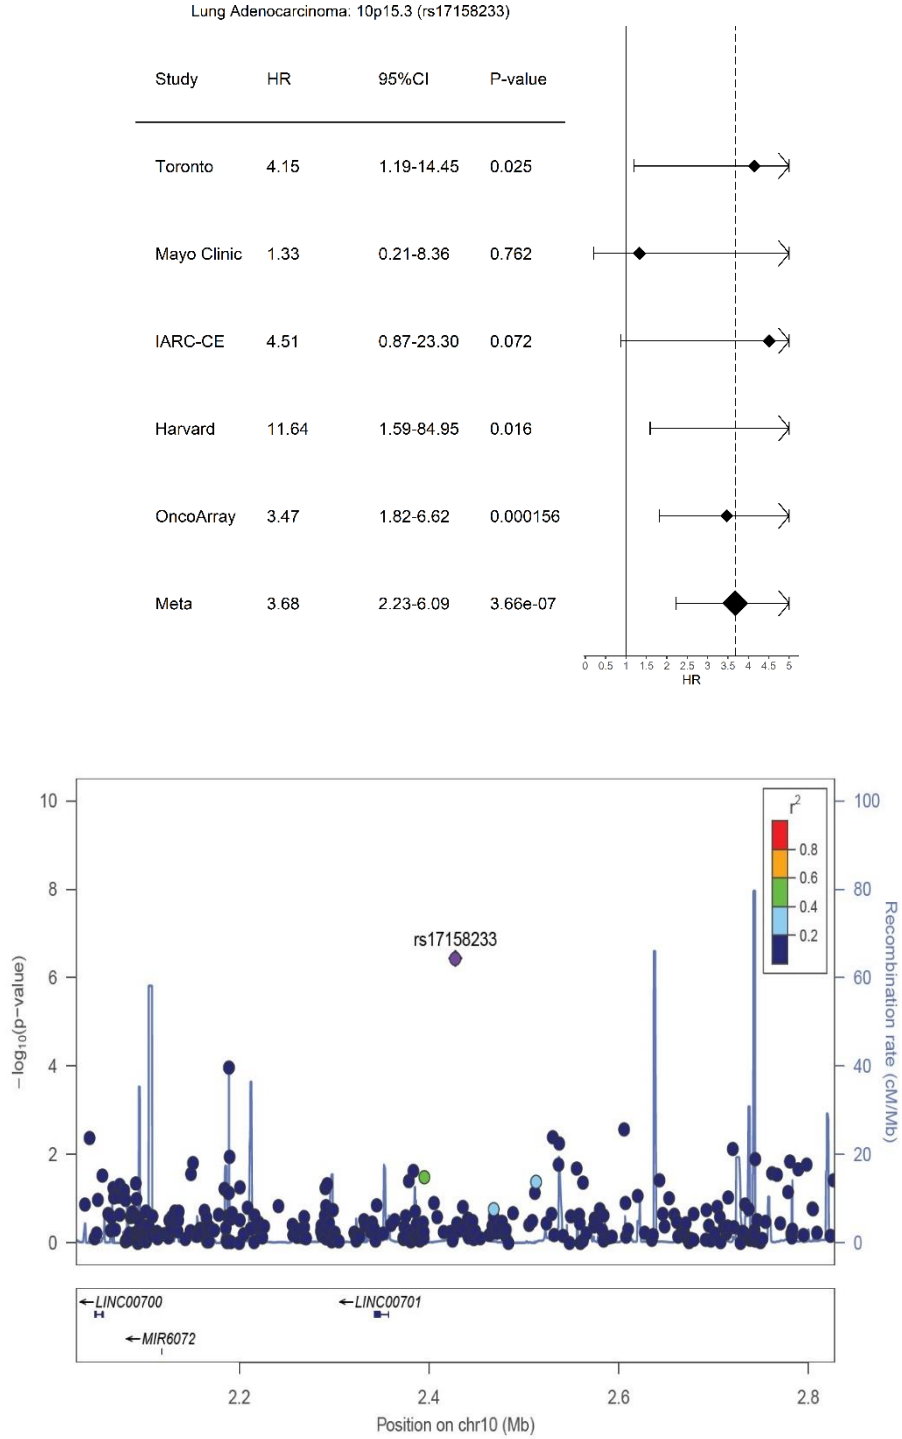

**Supplementary Figure 3I:** Forest plot for study specific hazard ratio, Kaplan-Meier plot and regional plot (11q14.1 - rs17148028)

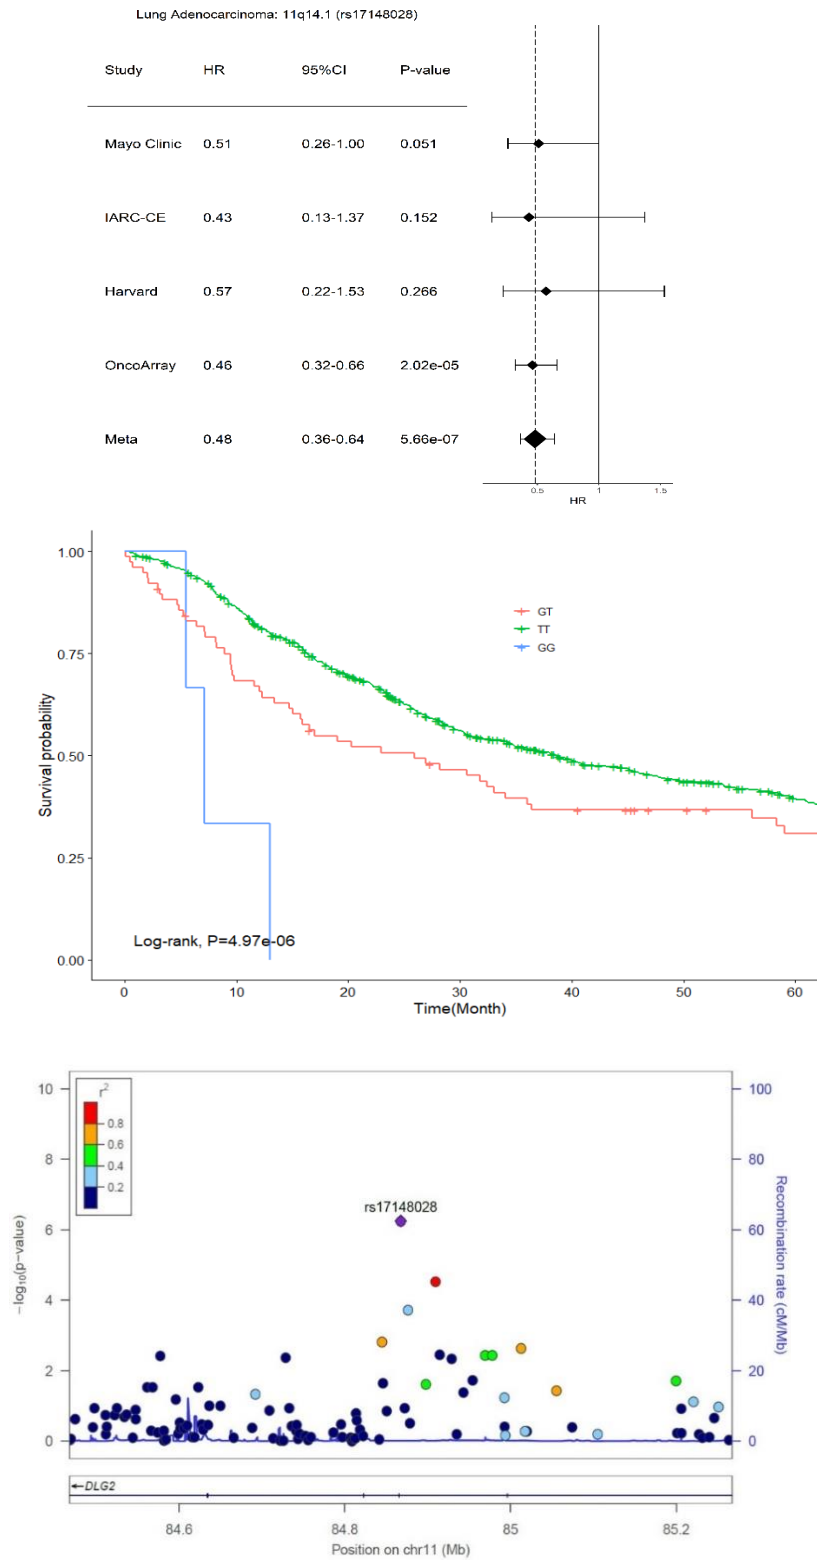

Supplement: NIHMS1614593-supplement-4.pdf [file NIHMS1614593-supplement-4.pdf]
