# Supplementary material
Source: PubMed Central journal article supplement (PMC7541720)

**Supplementary Figure 2:** Manhattan plots for the associations between sequence variants and lung cancer overall survival ( $-\log_{10}P$ , y-axis) plotted against their respective chromosomal positions (x-axis). (a) all lung cancer (b) adenocarcinoma

(a)

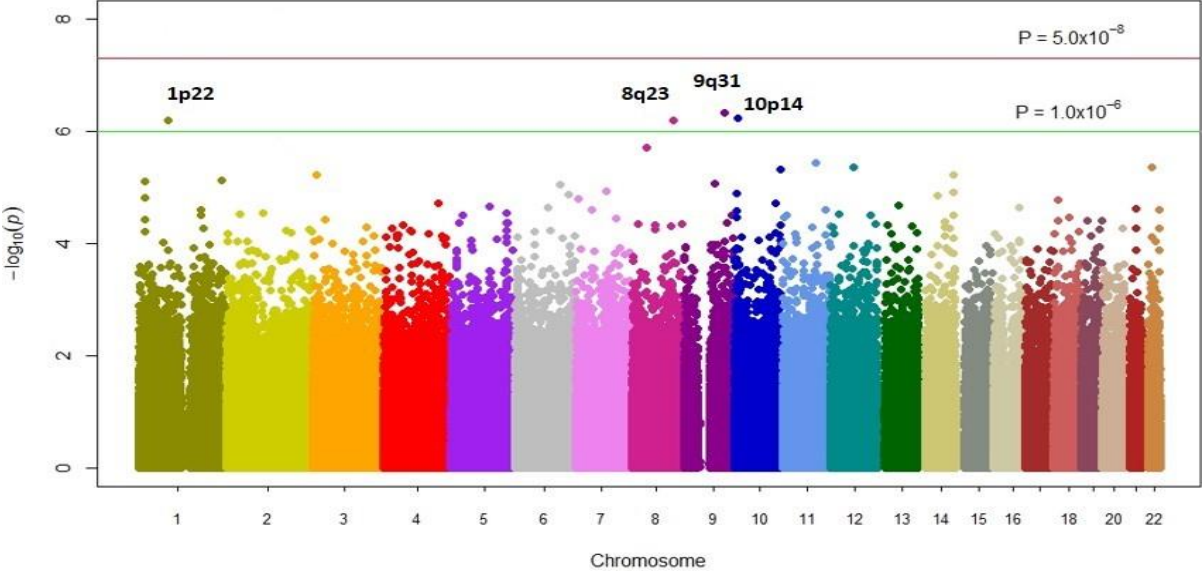

(b)

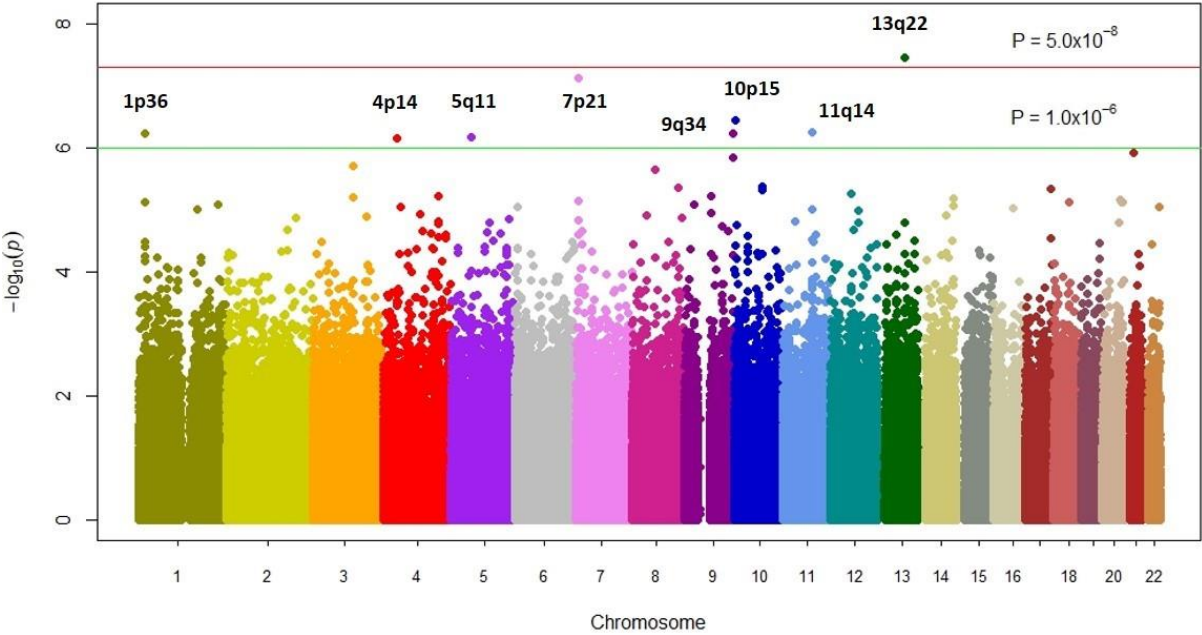

Supplement: NIHMS1614593-supplement-3.pdf [file NIHMS1614593-supplement-3.pdf]
